# Supplementary material for: Three cation-templated Cu(i) self-assemblies: synthesis, structures, and photocatalytic properties
Source: Royal Society of Chemistry journal article supplement (doi:10.1039/c5nj03321g), 2016-01-01
Supplement: c5nj03321g1.pdf [file c5nj03321g1.pdf]

Supplementary material for

**Three cation-templated Cu(I) self-assemblies: synthesis, structures,  
 and photocatalytic properties**

**Man-Man Xu, Yao Li, Lin-Jie Zheng, Yun-Yin Niu\* and Hong-Wei Hou\***

*College of Chemistry and Molecular Engineering, Zhengzhou 450001, P. R. China.*

*Email: niuyy@zzu.edu.cn*

**Table S1** Selected bond lengths (Å) and angles (°) for compounds **1-3**

| Bond                                   | Å          | Bond                    | Å         | Bond                                   | Å          |
|----------------------------------------|------------|-------------------------|-----------|----------------------------------------|------------|
| <b>1</b>                               |            |                         |           |                                        |            |
| Br1-Cu1                                | 2.3803(10) | Br2-Cu1                 | 2.3483(9) | Br3-Cu1                                | 2.3678(11) |
| <b>2</b>                               |            |                         |           |                                        |            |
| Cu1-Cu1 <sup>1</sup>                   | 2.648(4)   | Cu1-I2                  | 2.600(2)  | Cu2-I3                                 | 2.7028(16) |
| Cu1-Cu2 <sup>2</sup>                   | 2.974(3)   | Cu1-I3                  | 2.715(2)  | Cu2-I3 <sup>1</sup>                    | 2.7028(16) |
| Cu1-Cu2                                | 2.974(3)   | Cu2-Cu1 <sup>1</sup>    | 2.974(3)  | Cu2-I4                                 | 2.601(3)   |
| Cu1-I1                                 | 2.7122(13) | Cu2-Cu2 <sup>2</sup>    | 2.756(5)  | I1-Cu1 <sup>1</sup>                    | 2.7122(13) |
| Cu1-I1 <sup>2</sup>                    | 2.7122(13) | Cu2-I1                  | 2.714(3)  | I3-Cu2 <sup>2</sup>                    | 2.7028(16) |
| <b>3</b>                               |            |                         |           |                                        |            |
| Cu1-S1                                 | 2.4212(9)  | Cu1-S2                  | 2.3882(9) | Cu1-N1 <sup>2</sup>                    | 1.983(3)   |
| Cu1-N23                                | 1.996(3)   | S1-C1                   | 1.657(3)  | S2-C2                                  | 1.659(3)   |
| N1-Cu1 <sup>2</sup>                    | 1.983(3)   | N1-C1                   | 1.147(4)  | N2-Cu1 <sup>4</sup>                    | 1.996(3)   |
| N2-C2                                  | 1.151(4)   |                         |           |                                        |            |
| <b>Angle</b>                           |            |                         |           |                                        |            |
|                                        | °          |                         | °         |                                        | °          |
| <b>1</b>                               |            |                         |           |                                        |            |
| Br2-Cu1-Br1                            | 123.38(4)  | Br2-Cu1-Br3             | 123.72(4) | Br3-Cu1-Br1                            | 112.65(4)  |
| <b>2</b>                               |            |                         |           |                                        |            |
| Cu1 <sup>1</sup> -Cu1-Cu2              | 63.57(5)   | I1 <sup>2</sup> -Cu1-I1 | 120.40(8) | I3-Cu1-Cu2 <sup>2</sup>                | 56.51(6)   |
| Cu1 <sup>1</sup> -Cu1-Cu2 <sup>2</sup> | 63.57(5)   | I1-Cu1-I3               | 105.34(6) | Cu1-Cu2-Cu1 <sup>1</sup>               | 52.86(9)   |
| Cu1 <sup>1</sup> -Cu1-I1 <sup>2</sup>  | 60.78(4)   | I1 <sup>2</sup> -Cu1-I3 | 105.34(6) | Cu2 <sup>2</sup> -Cu2-Cu1 <sup>1</sup> | 62.40(5)   |
| Cu1 <sup>1</sup> -Cu1-I1               | 60.78(4)   | I2-Cu1-Cu1 <sup>1</sup> | 136.94(5) | Cu2 <sup>2</sup> -Cu2-Cu1              | 62.40(5)   |
| Cu1 <sup>1</sup> -Cu1-I3               | 111.33(5)  | I2-Cu1-Cu2              | 148.04(6) | I1-Cu2-Cu1 <sup>1</sup>                | 56.74(6)   |
| Cu2-Cu1-Cu2 <sup>2</sup>               | 55.21(11)  | I2-Cu1-Cu2 <sup>2</sup> | 148.04(6) | I1-Cu2-Cu1                             | 56.74(6)   |
| I1-Cu1-Cu2 <sup>2</sup>                | 104.85(8)  | I2-Cu1-I1 <sup>2</sup>  | 107.03(5) | I1-Cu2-Cu2 <sup>2</sup>                | 111.07(6)  |
| I1-Cu1-Cu2                             | 56.78(6)   | I2-Cu1-I1               | 107.03(5) | I3 <sup>1</sup> -Cu2-Cu1               | 102.43(9)  |

|                                       |            |                         |            |                                       |            |
|---------------------------------------|------------|-------------------------|------------|---------------------------------------|------------|
| I1 <sup>2</sup> -Cu1-Cu2              | 104.86(8)  | I2-Cu1-I3               | 111.73(8)  | I3 <sup>1</sup> -Cu2-Cu1 <sup>1</sup> | 56.90(6)   |
| I1 <sup>2</sup> -Cu1-Cu2 <sup>2</sup> | 56.78(6)   | I3-Cu1-Cu2              | 56.51(6)   | I3-Cu2-Cu1 <sup>1</sup>               | 102.43(9)  |
| I3-Cu2-Cu1                            | 56.90(6)   | I4-Cu2-Cu1 <sup>1</sup> | 149.52(7)  | Cu1-I1-Cu1 <sup>1</sup>               | 58.43(7)   |
| I3-Cu2-Cu2 <sup>2</sup>               | 59.34(5)   | I4-Cu2-Cu1              | 149.52(7)  | Cu1-I1-Cu2                            | 66.48(7)   |
| I3 <sup>1</sup> -Cu2-Cu2 <sup>2</sup> | 59.34(5)   | I4-Cu2-Cu2 <sup>2</sup> | 136.92(7)  | Cu1 <sup>1</sup> -I1-Cu2              | 66.48(7)   |
| I3-Cu2-I1                             | 105.64(7)  | I4-Cu2-I1               | 112.01(10) | Cu2 <sup>2</sup> -I3-Cu1              | 66.59(7)   |
| I3 <sup>1</sup> -Cu2-I1               | 105.64(7)  | I4-Cu2-I3               | 108.01(7)  | Cu2-I3-Cu1                            | 66.59(7)   |
| I3-Cu2-I3 <sup>1</sup>                | 117.57(10) | I4-Cu2-I3 <sup>1</sup>  | 108.01(7)  | Cu2 <sup>2</sup> -I3-Cu2              | 61.32(10)  |
| <b>3</b>                              |            |                         |            |                                       |            |
| N1 <sup>2</sup> -Cu1-S1               | 101.73(7)  | N2 <sup>3</sup> -Cu1-S1 | 113.48(8)  | C2-S2-Cu1                             | 102.31(10) |
| N1 <sup>2</sup> -Cu1-S2               | 113.49(8)  | N2 <sup>3</sup> -Cu1-S2 | 106.25(8)  | C1-N1-Cu1 <sup>2</sup>                | 157.8(2)   |
| N1 <sup>2</sup> -Cu1N2 <sup>3</sup>   | 117.62(10) | C1-S1-Cu1               | 98.16(10)  | C2-N2-Cu1 <sup>4</sup>                | 174.2(2)   |
| N1-C1-S1                              | 179.3(3)   | N2-C2-S2                | 178.0(3)   | S2-Cu1-S1                             | 103.53(3)  |

**Table S2.** Structural parameters for the hydrogen bonds in **1**.

| Hydrogen Bonds           |          |               |          |               |          |
|--------------------------|----------|---------------|----------|---------------|----------|
| DH...A                   | d(D-A) Å | d(H-A) Å      | d(D-A) Å | D-H-A/°       |          |
| N2H2A...Br1 <sup>a</sup> | 0.86     | 2.68          | 3.457(5) | 151.3         |          |
| N4H4A...Br3 <sup>b</sup> | 0.87     | 2.55          | 3.346(4) | 152.7         |          |
| weak interactions        |          |               |          |               |          |
| DH...A                   | d(H-A) Å | DH...A        | d(H-A) Å | DH...A        | d(H-A) Å |
| N2-H2A...Br1             | 2.68     | N2-H2B...Br1  | 3.03     | C13-H13...Br3 | 2.79     |
| C9-H9...Br2              | 2.84     | C8-H8B...Br3  | 2.91     | C8-H8A...Br1  | 2.92     |
| C5-H5...Br1              | 2.96     | C18-H18...Br2 | 2.79     | C14-H14...Br3 | 2.99 Å   |
| N4-H4B...Br2             | 2.97     | N4-H4A...Br3  | 2.55     |               |          |

symmetry code <sup>a</sup>1 - x, -1/2 + y, 1/2 - z; <sup>b</sup>2 - x, 1 - y, 1 - z

**Table S3**

**Geometrical Coordinates of optimized complex [MAPB][Cu<sub>4</sub>I<sub>8</sub>]**

|   |    |            |             |             |
|---|----|------------|-------------|-------------|
| C | -1 | 4.62825800 | -4.46872800 | -5.03665900 |
| C | -1 | 4.62818200 | 4.46877500  | -5.03665900 |
| C | -1 | 4.50048300 | -3.29293100 | -4.43565900 |
| C | -1 | 4.50042800 | 3.29297500  | -4.43565800 |
| C | -1 | 4.35804900 | -5.66208900 | -4.35435000 |
| C | -1 | 4.35795300 | 5.66213100  | -4.35434900 |
| C | -1 | 3.97350900 | -5.54008700 | -3.02701700 |

|    |    |             |             |             |
|----|----|-------------|-------------|-------------|
| C  | -1 | 3.97341500  | 5.54012300  | -3.02701600 |
| C  | -1 | 4.03438400  | -1.85293000 | -2.50393900 |
| C  | -1 | 4.03435200  | 1.85296600  | -2.50393900 |
| C  | -1 | 3.83707900  | -4.30722200 | -2.49208800 |
| C  | -1 | 3.83700700  | 4.30725500  | -2.49208800 |
| C  | -1 | 6.10971400  | -1.76256000 | -1.22576800 |
| C  | -1 | 6.10968400  | 1.76263100  | -1.22576800 |
| C  | -1 | 4.76332900  | -1.84343200 | -1.19015500 |
| C  | -1 | 4.76329800  | 1.84348100  | -1.19015500 |
| C  | -1 | 4.07885000  | 1.85749900  | -0.00005400 |
| C  | -1 | 6.76742900  | -1.67203700 | -0.00006800 |
| C  | -1 | 4.07888200  | -1.85746200 | 0.00004600  |
| C  | -1 | 6.76740100  | 1.67212000  | 0.00003200  |
| C  | -1 | 4.76334200  | -1.84343300 | 1.19013900  |
| C  | -1 | 4.76331100  | 1.84348200  | 1.19013900  |
| C  | -1 | 6.10972700  | -1.76256000 | 1.22573800  |
| C  | -1 | 6.10969700  | 1.76263200  | 1.22573800  |
| C  | -1 | 3.83710600  | -4.30722200 | 2.49208100  |
| C  | -1 | 3.83703300  | 4.30725500  | 2.49208100  |
| C  | -1 | 4.03441000  | -1.85292800 | 2.50393100  |
| C  | -1 | 4.03437800  | 1.85296500  | 2.50393100  |
| C  | -1 | 3.97354100  | -5.54008700 | 3.02700900  |
| C  | -1 | 3.97344700  | 5.54012200  | 3.02701000  |
| C  | -1 | 4.35809500  | -5.66209000 | 4.35433800  |
| C  | -1 | 4.35799900  | 5.66213100  | 4.35433800  |
| C  | -1 | 4.50053100  | -3.29293000 | 4.43564600  |
| C  | -1 | 4.50047500  | 3.29297500  | 4.43564600  |
| C  | -1 | 4.62831100  | -4.46872800 | 5.03664400  |
| C  | -1 | 4.62823500  | 4.46877500  | 5.03664400  |
| Cu | -1 | -3.77019700 | 0.00000200  | -1.32391300 |
| Cu | -1 | -1.49578100 | -1.37468200 | -0.00002500 |
| Cu | -1 | -1.49580500 | 1.37462500  | -0.00002500 |
| Cu | -1 | -3.77018300 | 0.00000200  | 1.32398700  |
| H  | 0  | 4.91222100  | -4.49873200 | -6.08429500 |
| H  | 0  | 4.91214600  | 4.49878300  | -6.08429500 |
| H  | 0  | 4.61592100  | -6.91661700 | -5.91716200 |
| H  | 0  | 4.61580300  | 6.91666300  | -5.91716100 |
| H  | 0  | 4.68628100  | -2.36241500 | -4.95855300 |
| H  | 0  | 4.68624600  | 2.36246300  | -4.95855200 |
| H  | 0  | 4.13187200  | -7.66223000 | -4.46141800 |
| H  | 0  | 4.13174400  | 7.66226900  | -4.46141800 |
| H  | 0  | 4.46511800  | -1.14096200 | -3.20836900 |
| H  | 0  | 4.46509400  | 1.14100600  | -3.20837200 |
| H  | 0  | 3.69061900  | -6.40572700 | -2.43791100 |

|   |    |             |             |             |
|---|----|-------------|-------------|-------------|
| H | 0  | 3.69051200  | 6.40575800  | -2.43791100 |
| H | 0  | 2.96508700  | -1.64121400 | -2.38375200 |
| H | 0  | 2.96505900  | 1.64123200  | -2.38374800 |
| H | 0  | 6.66887700  | -1.71994700 | -2.15570700 |
| H | 0  | 6.66887900  | 1.72002600  | -2.15568500 |
| H | 0  | 3.43846300  | -4.16279000 | -1.49386600 |
| H | 0  | 3.43839000  | 4.16281800  | -1.49386700 |
| H | 0  | 2.98687600  | 1.91471600  | 0.00002800  |
| H | 0  | 7.85124900  | -1.57242900 | -0.00011700 |
| H | 0  | 2.98690900  | -1.91469600 | 0.00012200  |
| H | 0  | 7.85122300  | 1.57253000  | -0.00002000 |
| H | 0  | 3.43853300  | -4.16277600 | 1.49385900  |
| H | 0  | 3.43846300  | 4.16280200  | 1.49385900  |
| H | 0  | 6.66887400  | -1.72014400 | 2.15567300  |
| H | 0  | 6.66881300  | 1.72022600  | 2.15569600  |
| H | 0  | 2.96519400  | -1.63952400 | 2.38376100  |
| H | 0  | 2.96516500  | 1.63954200  | 2.38376600  |
| H | 0  | 3.69092500  | -6.40574900 | 2.43780600  |
| H | 0  | 3.69081500  | 6.40578000  | 2.43780700  |
| H | 0  | 4.46607300  | -1.14121800 | 3.20811800  |
| H | 0  | 4.46605900  | 1.14126200  | 3.20811600  |
| H | 0  | 4.13203500  | -7.66224600 | 4.46137500  |
| H | 0  | 4.13190500  | 7.66228400  | 4.46137600  |
| H | 0  | 4.68718100  | -2.36246900 | 4.95831600  |
| H | 0  | 4.68713700  | 2.36251600  | 4.95831700  |
| H | 0  | 4.61590700  | -6.91665400 | 5.91714400  |
| H | 0  | 4.61579200  | 6.91670100  | 5.91714400  |
| H | 0  | 4.91270000  | -4.49871800 | 6.08416300  |
| H | 0  | 4.91262300  | 4.49876900  | 6.08416300  |
| I | -1 | -5.54520700 | -0.00001300 | -3.22340300 |
| I | -1 | -1.24060100 | 0.00002400  | -2.31142600 |
| I | -1 | -4.02287000 | -2.35360000 | -0.00001100 |
| I | -1 | -4.02291000 | 2.35350000  | -0.00001100 |
| I | -1 | 0.28658200  | -3.27853300 | -0.00003400 |
| I | -1 | 0.28652700  | 3.27850600  | -0.00003400 |
| I | -1 | -1.24057700 | 0.00002400  | 2.31147400  |
| I | -1 | -5.54517300 | -0.00001300 | 3.22349700  |
| N | -1 | 4.46942700  | -6.83202700 | -4.92326100 |
| N | -1 | 4.46931100  | 6.83207100  | -4.92326100 |
| N | -1 | 4.16362700  | -3.20821500 | -3.16256800 |
| N | -1 | 4.16357300  | 3.20825400  | -3.16256800 |
| N | -1 | 4.16366100  | -3.20821600 | 3.16255800  |
| N | -1 | 4.16360700  | 3.20825400  | 3.16255900  |
| N | -1 | 4.46947900  | -6.83202700 | 4.92324800  |

N -1 4.46936400 6.83207100 4.92324800

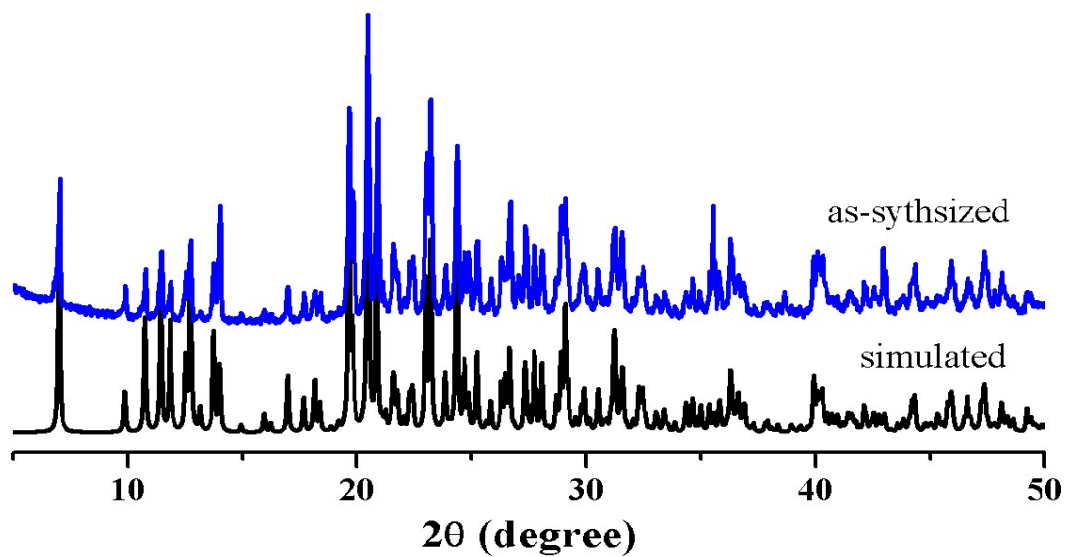

**Fig. S1** PXRD patterns for compound 1 and simulated spectra of compound 1 from single crystal data.

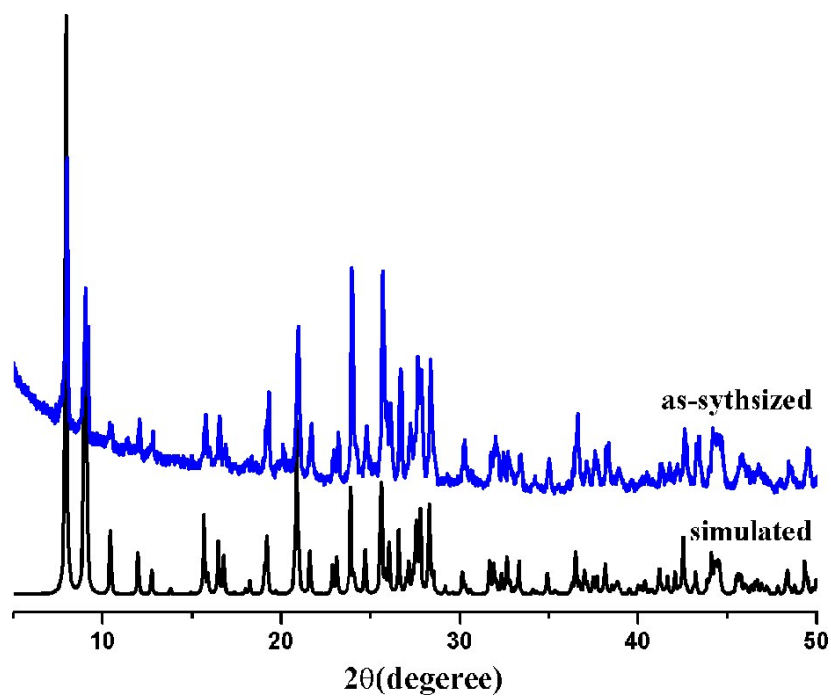

**Fig. S2** PXRD patterns for compound 2 and simulated spectra of compound 2 from single crystal data.

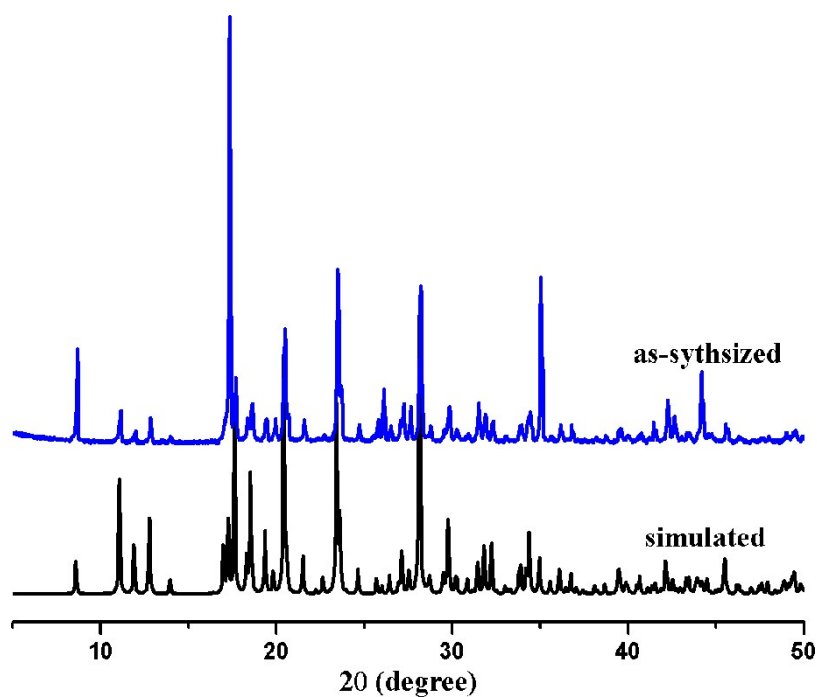

**Fig. S3** PXR D patterns for compound 3 and simulated spectra of compound 3 from single crystal data.

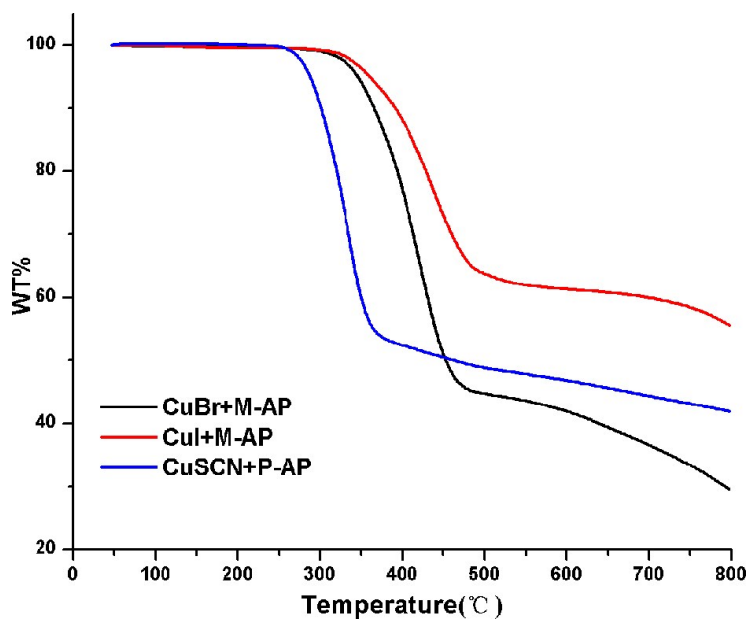

**Fig. S4** Thermal gravimetric analysis (TGA) curves for as-synthesized compound 1-3.

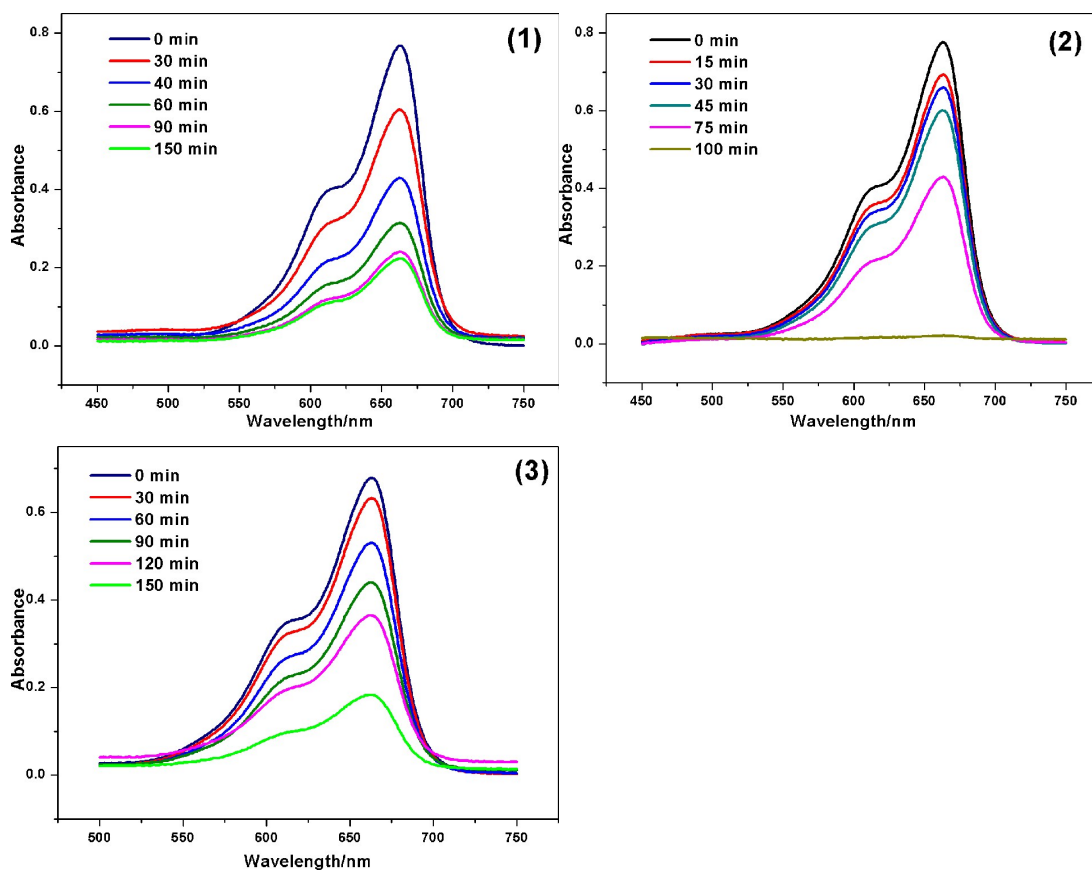

**Fig. S5** UV-Vis absorption spectra of methylene blue solution in presence of **1-3** for different time periods.

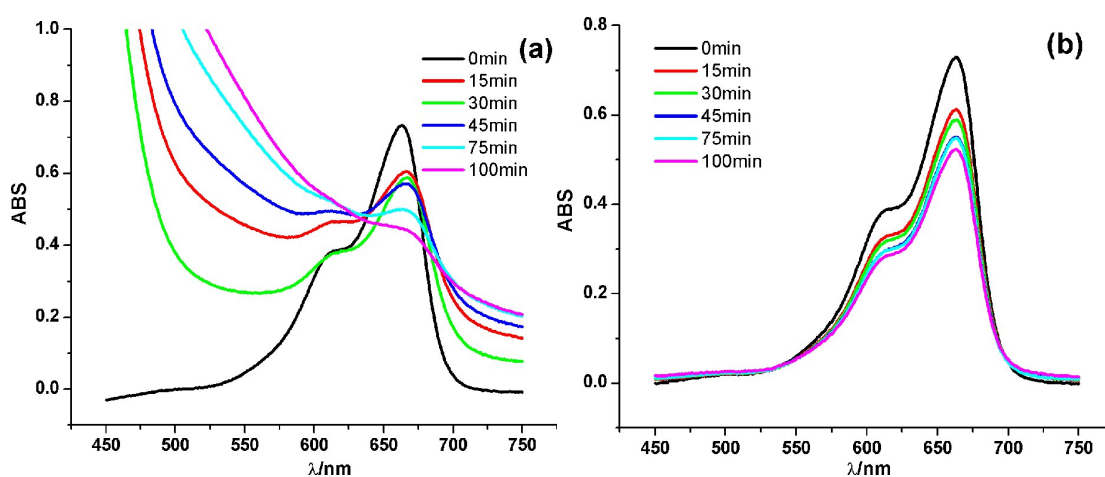

**Fig. S6** UV-Vis absorption spectra of methylene blue solution in the trapping experiment of active species during the photocatalytic reaction: (a) 0.1M BQ (a quencher of  $\bullet\text{O}_2^-$ ); (b) 0.1M IPA (a quencher of  $\bullet\text{OH}$ )
